# Supplementary material for: The Multiple Sclerosis Severity Score: fluctuations and prognostic ability in a longitudinal cohort of patients with MS
Source: PubMed Central journal article supplement — Mult Scler J Exp Transl Clin. 2019 Mar 18;5(1):2055217319837254. doi: 10.1177/2055217319837254 (PMC6423683; doi:10.1177/2055217319837254), 2019-03-18
Supplement: Supplemental_Material.pdf [file Supplemental_Material.pdf]

## Supplementary Materials

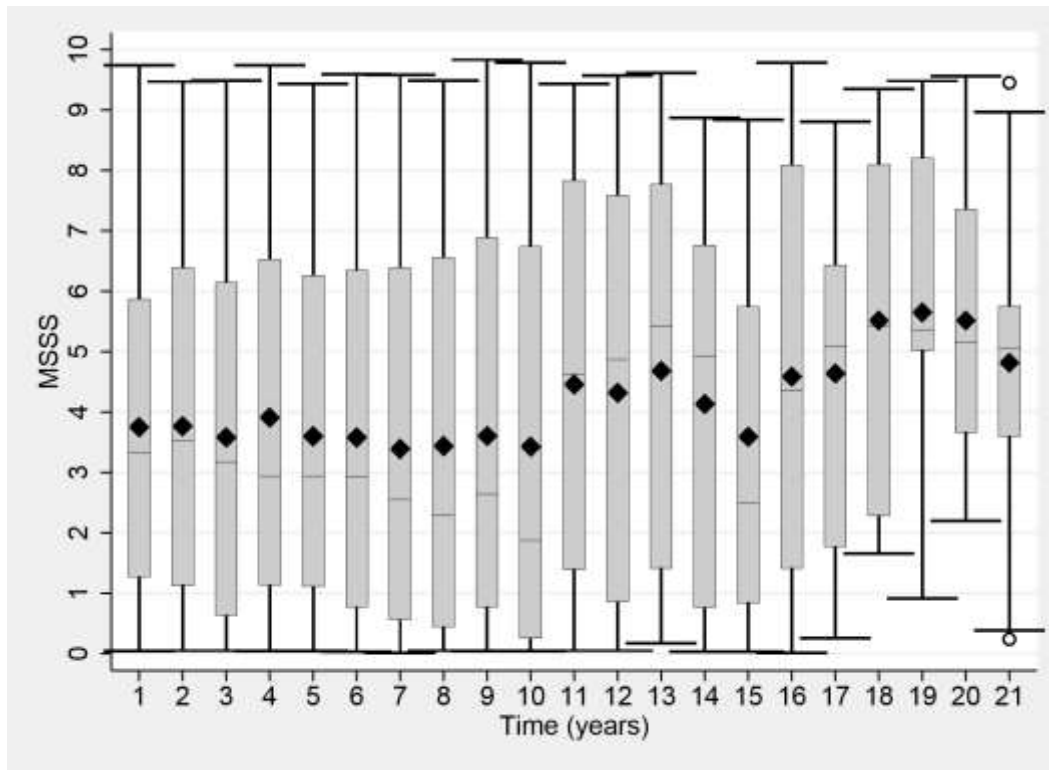

### Distribution of MSSS by years of follow-up

The boxplot shows the distribution of the raw MSSS values, group by year of follow up. The diamond is the mean, the line in the middle of the box is the median, and the box is the interquartile range, between the 25<sup>th</sup> and 75<sup>th</sup> percentiles. The whiskers extend from the box out to 1.5 times the interquartile range, or to the minimum and maximum observations if no observation are than 1.5 times the interquartile range away from the 25<sup>th</sup> or 75<sup>th</sup> quartiles. Observation beyond the range of the whiskers are denoted with hollow circles to indicate outliers.

| Time (years) | Estimated Mean | Standard Error | Denominator Degrees of Freedom | 95% Confidence Interval |        |
|--------------|----------------|----------------|--------------------------------|-------------------------|--------|
| [0, 1]       | 3.8155         | 0.1762         | 648                            | 3.4696                  | 4.1615 |
| (1, 2]       | 3.8076         | 0.1994         | 733                            | 3.4162                  | 4.199  |
| (2, 3]       | 3.6184         | 0.2079         | 729                            | 3.2102                  | 4.0265 |
| (3, 4]       | 3.4792         | 0.1987         | 714                            | 3.0891                  | 3.8692 |
| (4, 5]       | 3.4499         | 0.201          | 727                            | 3.0554                  | 3.8445 |
| (5, 6]       | 3.438          | 0.2043         | 737                            | 3.0369                  | 3.839  |
| (6, 7]       | 3.2848         | 0.1913         | 730                            | 2.9093                  | 3.6603 |
| (7, 8]       | 3.333          | 0.2092         | 760                            | 2.9224                  | 3.7437 |
| (8, 9]       | 3.2934         | 0.2            | 716                            | 2.9007                  | 3.6861 |
| (9, 10]      | 3.2544         | 0.2168         | 759                            | 2.8288                  | 3.6799 |
| (10, 11]     | 3.3192         | 0.2375         | 784                            | 2.8529                  | 3.7855 |
| (11, 12]     | 3.6098         | 0.2456         | 786                            | 3.1278                  | 4.0919 |
| (12, 13]     | 3.6111         | 0.2852         | 826                            | 3.0514                  | 4.1709 |
| (13, 14]     | 3.3924         | 0.3134         | 808                            | 2.7773                  | 4.0075 |
| (14, 15]     | 3.3474         | 0.3457         | 658                            | 2.6686                  | 4.0261 |
| (15, 16]     | 3.3898         | 0.3891         | 694                            | 2.6258                  | 4.1537 |

| Contrast                                     | Numerator Degrees of Freedom | Denominator Degrees of Freedom | F Statistic | p value |
|----------------------------------------------|------------------------------|--------------------------------|-------------|---------|
| Time Overall                                 | 15                           | 334                            | 1.59        | 0.0739  |
| Time Overall:<br>[0, 1], (7, 9],<br>(14, 16] | 2                            | 209                            | 5.65        | 0.0041  |

### Categorical model of MSSS over time

A longitudinal regression model was fit with each year of follow up being a categorical variable. To make fitting the longitudinal covariance matrix manageable, MSSS observations for each subject were averaged for each follow up year, and the number of observations was incorporated into the model as a weight. The table presents model estimated MSSS means for each follow up year, along with standard error, degrees of freedom for the standard error (denominator degrees of freedom), and 95% confidence intervals. The table below performs F tests using the model estimates to simultaneously test whether the means differ over follow up years. The first F test is for whether there is any difference among any follow up years. The second F test averages follow up years 7-8

and 8-9, and averages follow up years 14-15 and 15-16, and tests whether either differs from the first year of follow up.

| Label                              | Estimate | Standard Error | Denominator Degrees of Freedom | 95% Confidence Interval |         | T Statistic | p value |
|------------------------------------|----------|----------------|--------------------------------|-------------------------|---------|-------------|---------|
|                                    |          |                |                                |                         |         |             |         |
| <b>Baseline</b>                    | 3.8226   | 0.2461         | 133                            | 3.3359                  | 4.3094  |             |         |
| <b>8 Years</b>                     | 3.2817   | 0.2408         | 186                            | 2.8067                  | 3.7568  |             |         |
| <b>15 Years</b>                    | 3.5297   | 0.3611         | 54                             | 2.8058                  | 4.2536  |             |         |
| <b>Change 8 Years vs Baseline</b>  | -0.5409  | 0.2364         | 97.1                           | -1.0101                 | -0.0717 | -2.29       | 0.0243  |
| <b>Change 15 Years vs Baseline</b> | -0.2929  | 0.3854         | 53.5                           | -1.0659                 | 0.4800  | -0.76       | 0.4506  |
| <b>Change 15 vs 8 Years</b>        | 0.2480   | 0.3095         | 29.1                           | -0.3849                 | 0.8808  | 0.80        | 0.4295  |

| Contrast                   | Numerator Degrees of Freedom | Denominator Degrees of Freedom | F Statistic | p value |
|----------------------------|------------------------------|--------------------------------|-------------|---------|
| <b>Overall Time Effect</b> | 2                            | 55.4                           | 2.90        | 0.0634  |

### **Categorical model evaluating change from baseline to year 8 and year 15, and between year 8 and 15**

MSSS observations in the first year of follow up were selected, along with observations between 7 and 9 years and 14 and 16 years of follow up. For each subject the MSSS observations within each of the three periods were averaged to create a MSSS observation representing baseline, 8 years of follow up, and 15 years of follow up. The compressed MSSS observations were then used to fit a longitudinal regression model with categorical time. Mean MSSS was estimated for each time, the times were pair-wise compared, and omnibus F test was performed for mean MSSS differences among the times. Standard errors, degrees of freedom, 95% confidence intervals, T statistics, and p values were presented along with the estimates as applicable.

| Label                | Estimate | Standard Error | Denominator Degrees of Freedom | 95% Confidence Interval |          | T Statistic | p value |
|----------------------|----------|----------------|--------------------------------|-------------------------|----------|-------------|---------|
| <b>1 Year Change</b> | -0.04691 | 0.01655        | 118                            | -0.07969                | -0.01413 | -2.83       | 0.0054  |

### **Linear mixed model of MSSS**

A longitudinal regression model was fit to the MSSS data, with the explanatory variable time of follow up. Time was treated as continuous, and a linear slope was fit.
